# Supplementary material for: Accurate construction of cell membrane biomimetic graphene nanodecoys via purposeful surface engineering to improve screening efficiency of active components of traditional Chinese medicine
Source: PubMed Central journal article supplement — Acta Pharm Sin B. 2021 May 26;12(1):394–405. doi: 10.1016/j.apsb.2021.05.021 (PMC8799996; doi:10.1016/j.apsb.2021.05.021), 2021-05-26
Supplement: mmc1.pdf [file mmc1.pdf]

**Supporting Information for  
ORIGINAL ARTICLE**

**Accurate construction of cell membrane biomimetic  
graphene nanodecoys *via* purposeful surface engineering to  
improve screening efficiency of active components of  
traditional Chinese medicine**

Qi Hu<sup>a,b</sup>, Lanlan Jia<sup>a,b</sup>, Xiaolin Zhang<sup>a,b</sup>, Aihong Zhu<sup>a,b</sup>, Sicen Wang<sup>a,b</sup>,  
Xiaoyu Xie<sup>a,b,\*</sup>

<sup>a</sup>*School of Pharmacy, Health Science Center, Xi'an Jiaotong University, Xi'an 710061, China*

<sup>b</sup>*Shaanxi Engineering Research Center of Cardiovascular Drugs Screening & Analysis, Xi'an 710061, China*

Received 6 March 2021; received in revised form 9 April 2021; accepted 12 April 2021

\*Corresponding author. Tel./fax: +86 29 82656788.

E-mail address: xiexiaoyu@xjtu.edu.cn (Xiaoyu Xie).

**Samples preparation for TEM:**

1. 300 mesh carbon coated grids were used.
2. GO, PMGO, and HPMGO solution were prepared and ultrasonically dispersed evenly. (GO and PMGO were dispersed in ethanol at a concentration of 0.1 mg/mL, while HPMGO was dispersed in water at the same concentration.)
3. A drop (approx. 20  $\mu$ L) of GO, PMGO, and HPMGO solution was placed on the grid, respectively.
4. Samples were dried overnight in a Petri dish and observed the next day in TEM.

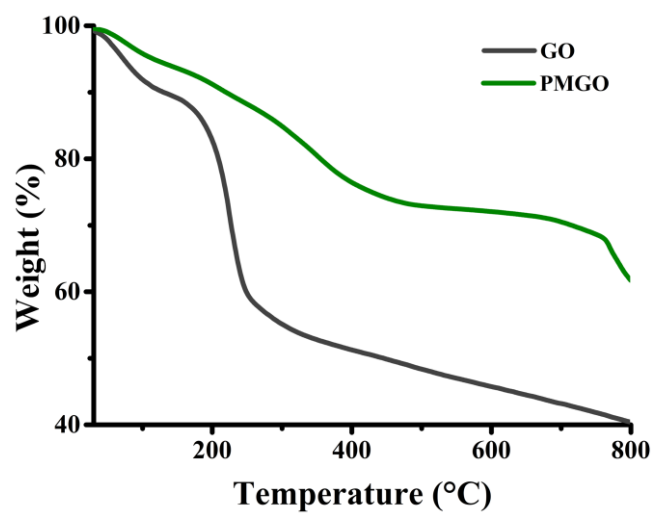

**Figure S1** TGA analysis results of GO and PMGO.

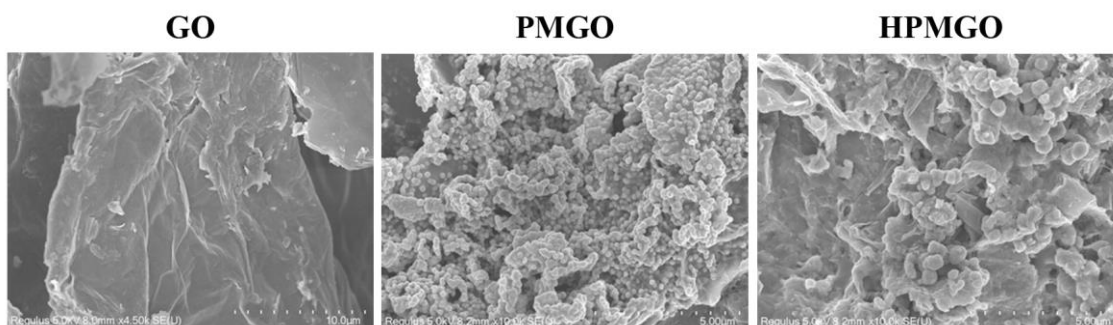

**Figure S2** SEM characterization of GO (scale bar=10.0  $\mu\text{m}$ ), PMGO (scale bar=5.00  $\mu\text{m}$ ), and HPMGO (scale bar=5.00  $\mu\text{m}$ ).

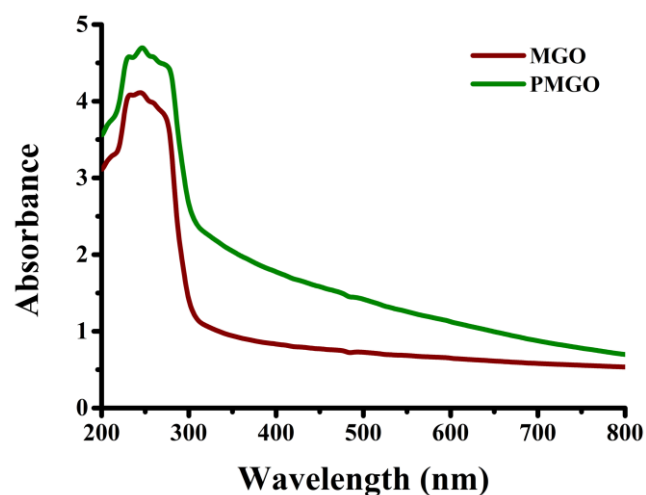

**Figure S3** UV/Vis spectra of MGO and PMGO.

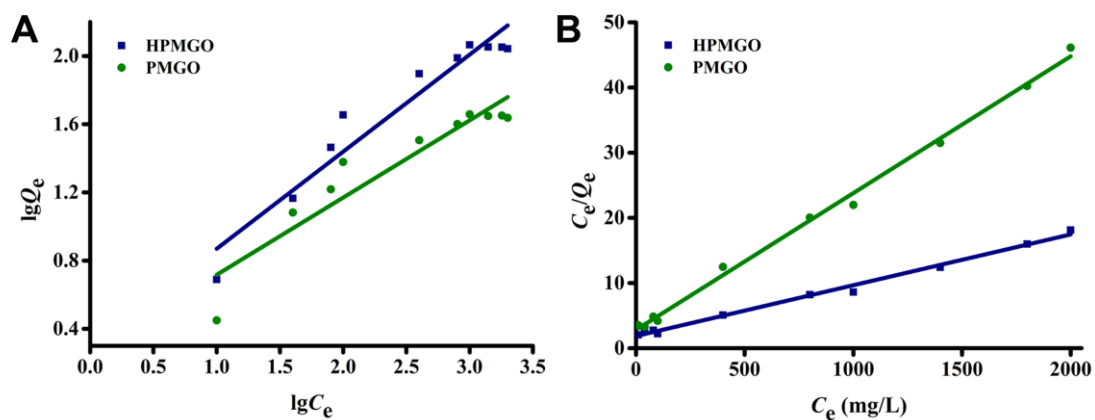

**Figure S4** (A) Freundlich and (B) Langmuir isotherm models to fit the equilibrium adsorption data of PMGO and HPMGO.

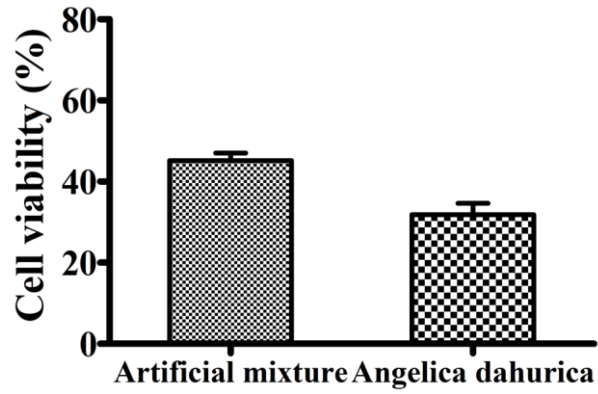

**Figure S5** The cytotoxicity of HeLa cells incubated with the artificial mixture and *Angelica dahurica*. Data are presented as mean  $\pm$ SD ( $n=3$ ).

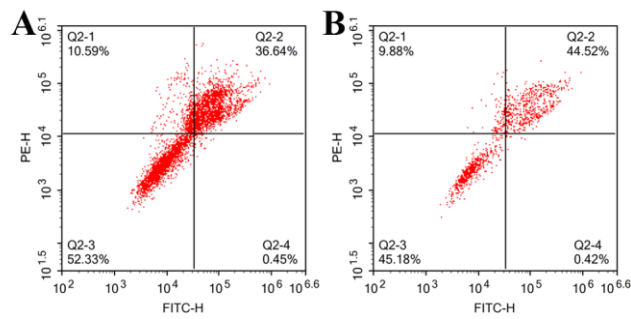

**Figure S6** The apoptosis of HeLa cells incubated with the (A) artificial mixture, and (B) *Angelica dahurica*.

**Table S1** Equations and parameters of adsorption isotherms of PMGO and HPMGO.

| Isotherm model | Equation and parameters                                          | HPMGO  | PMGO   |
|----------------|------------------------------------------------------------------|--------|--------|
| Freundlich     | $lgQ_e = lgK_F + mlgC_e$                                         |        |        |
|                | $K_F$ (L/mg)                                                     | 1.9943 | 0.9987 |
|                | $m$                                                              | 0.5694 | 0.4530 |
|                | $r$                                                              | 0.9652 | 0.9887 |
| Langmuir       | $\frac{C_e}{Q_e} = \frac{1}{Q_{max}K_L} + \frac{1}{Q_{max}} C_e$ |        |        |
|                | $K_L$ (L/mg)                                                     | 0.0042 | 0.0075 |
|                | $Q_{max}$ (mg/g)                                                 | 128.21 | 47.62  |
|                | $r$                                                              | 0.9963 | 0.9981 |

HPMGO, Hela CM coated PEGylated magnetic graphene oxide; PMGO, PEGylated magnetic graphene oxide.

**Table S2** Kinetic parameters for adsorption of vinorelbine ditartrate onto HPMGO and PMGO.

| Kinetic model       | Model parameters            | HPMGO  | PMGO   |
|---------------------|-----------------------------|--------|--------|
| Pseudo-first-order  | $K_1$ ( $\text{min}^{-1}$ ) | 0.5516 | 1.9713 |
|                     | $q_e$ (mg/g)                | 37.58  | 15.74  |
|                     | $r$                         | 0.9907 | 0.9835 |
| Pseudo-second-order | $K_2$ (g/mg/min)            | 0.0186 | 0.1892 |
|                     | $q_e$ (mg/g)                | 41.23  | 16.36  |
|                     | $r$                         | 0.9915 | 0.9975 |

HPMGO, Hela CM coated PEGylated magnetic graphene oxide; PMGO, PEGylated magnetic graphene oxide.
